# Supplementary material for: On the origin of the shift between vertical excitation and band maximum in molecular photoabsorption
Source: PubMed Central journal article supplement (PMC7174274; doi:10.1007/s00894-020-04355-y), 2020-04-21
Supplement: 894_2020_4355_MOESM1_ESM.pdf [file 894_2020_4355_MOESM1_ESM.pdf]

## **Supporting Information**

# **On the Origin of the Shift Between Vertical Excitation and Band Maximum in Molecular Photoabsorption**

Shuming Bai, Ritam Mansour, Ljiljana Stojanović, Josene M. Toldo, Mario Barbatti

### **Table of Contents**

|                                                                           |           |
|---------------------------------------------------------------------------|-----------|
| <b>NUCLEAR ENSEMBLE SPECTRUM SIMULATION AND VERTICAL EXCITATION .....</b> | <b>2</b>  |
| <b>CARTESIAN COORDINATES.....</b>                                         | <b>10</b> |

## Nuclear ensemble spectrum simulation and vertical excitations

The nuclear ensemble spectrum for each of the molecules in the Mülheim molecular dataset was computed for  $N_f$  states. The spectrum was then fitted with the equation

$$\sigma_A(E) = 0.619 \sum_{i=1}^N \frac{f_i}{\Gamma_i} e^{-(E-E_i^v+\delta_i)^2/\Gamma_i^2},$$

where  $E_i^v$ ,  $f_i$ ,  $\delta_i$ , and  $\Gamma_i$  are, respectively, the vertical excitation, oscillator strength, shift, and width of sub-band  $i$ . In this equation, energies  $E$  in eV yield absorption cross sections in  $\text{\AA}^2 \cdot \text{molecule}^{-1}$ . The number  $N$  of sub-bands was determined by the number of vertical excitations with the largest oscillator strengths lying within the spectral region to be fitted. In the fitting process,  $E_i^v$  (eV) and  $f_i$  were kept fixed.  $\Gamma_i$  (eV) and  $\delta_i$  (eV) are the results of the fitting. For some of the molecules,  $f_i$  was further released to improve the fitting, producing  $f_i^{fit}$ . One band with spectral band maximum  $E^{\max}$  (eV) may be composed of one or more sub-bands.

| Mol.<br>( $N_f$ ) | Spectrum convolution                                                                | $E_i^v$      | $f_i$          | $\delta_i$   | $\Gamma_i$     | $f_i^{fit}$    | $E^{\max}$ |
|-------------------|-------------------------------------------------------------------------------------|--------------|----------------|--------------|----------------|----------------|------------|
| 1<br>(6)          | 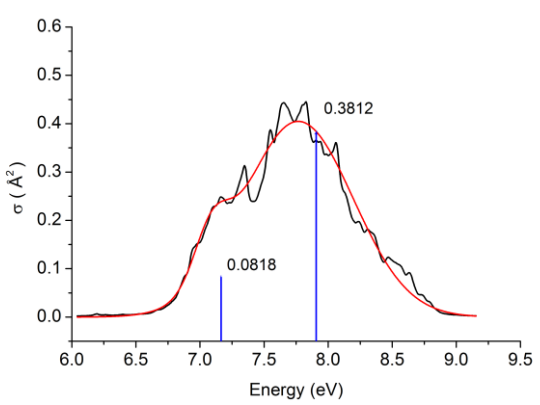 | 7.16<br>7.91 | 0.082<br>0.381 | 0.07<br>0.14 | 0.192<br>0.605 | 0.032<br>0.395 | 7.77       |

|          |                                                                                     |      |       |      |       |       |      |
|----------|-------------------------------------------------------------------------------------|------|-------|------|-------|-------|------|
| 2<br>(6) | 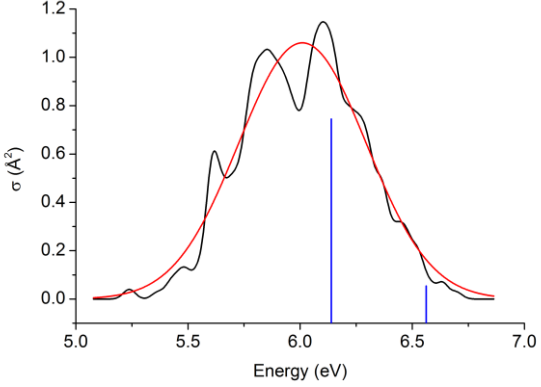   | 6.14 | 0.745 | 0.13 | 0.403 | 0.690 | 6.01 |
| 3<br>(6) |   | 5.18 | 1.265 | 0.10 | 0.400 | 1.110 | 5.08 |
| 4<br>(6) |  | 4.53 | 1.778 | 0.06 | 0.329 | 1.681 | 4.47 |
| 5<br>(6) |  | 6.75 | 0.075 | 0.02 | 0.771 | 0.094 | 7.12 |
|          |                                                                                     | 7.09 | 0.031 | 0.19 | 0.294 | 0.034 |      |
|          |                                                                                     | 7.40 | 0.058 | 0.14 | 0.287 | 0.052 |      |

|           |                                                                                     |              |                |              |                |                 |      |
|-----------|-------------------------------------------------------------------------------------|--------------|----------------|--------------|----------------|-----------------|------|
| 6<br>(6)  | 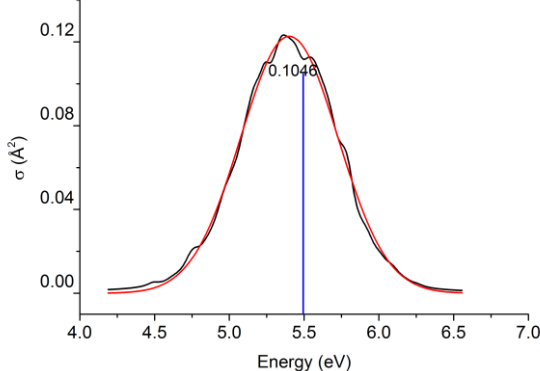   | 5.49         | 0.105          | 0.09         | 0.460          | 0.091           | 5.40 |
| 7<br>(6)  |   | 5.64<br>6.09 | 0.018<br>0.018 | 0.07<br>0.18 | 0.296<br>0.356 | 0.018<br>0.017  | 5.67 |
| 8<br>(10) |  | 6.89<br>7.19 | 0.078<br>0.77  | 0.06<br>0.15 | 0.059<br>0.155 | 0.1353<br>0.898 | 7.03 |
| 9<br>(6)  |  | 4.79         | 0.08           | 0.13         | 0.360          | 0.091           | 4.66 |

|           |  |                      |                         |                      |                         |                         |      |
|-----------|--|----------------------|-------------------------|----------------------|-------------------------|-------------------------|------|
| 10<br>(6) |  | 6.39<br>6.43         | 0.185<br>0.042          | 0.10<br>0.00         | 0.328<br>0.749          | 0.185<br>0.042          | 6.29 |
| 11<br>(6) |  | 5.77<br>5.86<br>6.28 | 0.013<br>0.027<br>0.189 | 0.15<br>0.21<br>0.21 | 0.4<br>0.134<br>0.309   | 0.000<br>0.010<br>0.189 | 6.07 |
| 12<br>(6) |  | 6.30<br>6.35<br>6.44 | 0.032<br>0.027<br>0.153 | 0.03<br>0.00<br>0.14 | 0.032<br>0.027<br>0.153 | 0.277<br>0.271<br>0.455 | 6.28 |
| 13<br>(6) |  | 5.04<br>5.32         | 0.005<br>0.032          | 0.27<br>0.05         | 0.216<br>0.278          | 0.005<br>0.035          | 5.27 |

|                   |  |                               |                                  |                               |                                  |                                  |                      |
|-------------------|--|-------------------------------|----------------------------------|-------------------------------|----------------------------------|----------------------------------|----------------------|
| <p>14<br/>(6)</p> |  | <p>4.18<br/>5.14</p>          | <p>0.006<br/>0.085</p>           | <p>0.14<br/>0.05</p>          | <p>0.213<br/>0.229</p>           | <p>0.007<br/>0.079</p>           | <p>4.04<br/>5.09</p> |
| <p>15<br/>(6)</p> |  | <p>4.44<br/>5.52<br/>6.11</p> | <p>0.006<br/>0.030<br/>0.004</p> | <p>0.07<br/>0.11<br/>0.15</p> | <p>0.395<br/>0.262<br/>0.323</p> | <p>0.006<br/>0.028<br/>0.017</p> | <p>4.37<br/>5.43</p> |
| <p>16<br/>(6)</p> |  | <p>3.83<br/>5.39</p>          | <p>0.005<br/>0.018</p>           | <p>0.08<br/>0.06</p>          | <p>0.286<br/>0.359</p>           | <p>0.006<br/>0.024</p>           | <p>3.75<br/>5.33</p> |

|           |                                                                                     |      |       |       |       |        |      |
|-----------|-------------------------------------------------------------------------------------|------|-------|-------|-------|--------|------|
| 17<br>(6) | 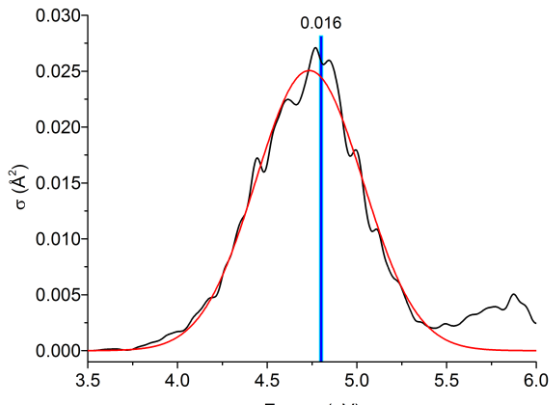   | 4.80 | 0.016 | 0.006 | 0.422 | 0.017  | 4.74 |
| 18<br>(6) |   | 5.24 | 0.056 | 0.09  | 0.364 | 0.051  | 5.15 |
| 19<br>(6) |  | 6.38 | 0.022 | 0.05  | 0.128 | 0.028  | 6.33 |
| 20<br>(6) |  | 5.74 | 0.031 | 0.08  | 0.226 | 0.0295 | 5.66 |

|            |                                                                                     |                                      |                                           |                                      |                                           |                                           |      |
|------------|-------------------------------------------------------------------------------------|--------------------------------------|-------------------------------------------|--------------------------------------|-------------------------------------------|-------------------------------------------|------|
| 21<br>(6)  | 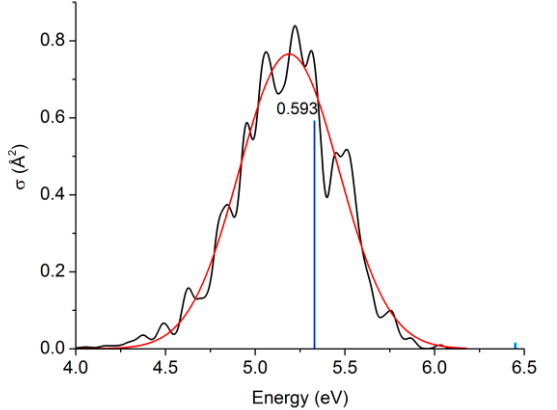   | 5.33                                 | 0.593                                     | 0.14                                 | 0.393                                     | 0.486                                     | 5.18 |
| 22<br>(15) |   | 6.13<br>6.55<br>6.71<br>7.23<br>7.53 | 0.028<br>0.021<br>0.064<br>0.029<br>0.337 | 0.05<br>0.17<br>0.01<br>0.10<br>0.05 | 0.349<br>0.215<br>0.251<br>0.241<br>0.500 | 0.028<br>0.021<br>0.064<br>0.029<br>0.337 | 7.43 |
| 23<br>(15) |  | 5.77<br>6.36<br>6.88<br>7.26<br>7.60 | 0.032<br>0.019<br>0.019<br>0.206<br>0.056 | 0.00<br>0.03<br>0.19<br>0.09<br>0.00 | 0.452<br>0.239<br>0.241<br>0.421<br>0.240 | 0.032<br>0.019<br>0.019<br>0.206<br>0.056 | 7.17 |
| 24<br>(15) |  | 5.77<br>6.36<br>6.76<br>7.19<br>7.48 | 0.026<br>0.020<br>0.014<br>0.189<br>0.027 | 0.02<br>0.08<br>0.00<br>0.16<br>0.00 | 0.399<br>0.247<br>0.259<br>0.394<br>0.192 | 0.026<br>0.020<br>0.014<br>0.189<br>0.027 | 6.88 |



|           |  |                      |                         |                      |                         |                         |      |
|-----------|--|----------------------|-------------------------|----------------------|-------------------------|-------------------------|------|
| 25<br>(6) |  | 4.68<br>5.57         | 0.05<br>0.137           | 0.08<br>0.18         | 0.412<br>0.391          | 0.050<br>0.137          | 5.35 |
| 26<br>(6) |  | 5.10<br>6.10<br>6.19 | 0.205<br>0.028<br>0.048 | 0.18<br>0.41<br>0.20 | 0.418<br>0.275<br>0.254 | 0.205<br>0.028<br>0.048 | 4.93 |
| 27<br>(6) |  | 5.34<br>6.30         | 0.182<br>0.068          | 0.17<br>0.23         | 0.344<br>0.430          | 0.159<br>0.093          | 5.16 |
| 28<br>(6) |  | 5.13<br>5.19         | 0.247<br>0.059          | 0.17<br>0.00         | 0.357<br>0.569          | 0.247<br>0.059          | 4.98 |

## Cartesian coordinates

All coordinates in Angstrom.

|                                                                                                                                                                                                                                                                                                                                                                                                                                                                                                                                                |                                                                                                                                                                                                                                                                                                                                                                                                                                                                                                                                                                                                                                                                                                     |
|------------------------------------------------------------------------------------------------------------------------------------------------------------------------------------------------------------------------------------------------------------------------------------------------------------------------------------------------------------------------------------------------------------------------------------------------------------------------------------------------------------------------------------------------|-----------------------------------------------------------------------------------------------------------------------------------------------------------------------------------------------------------------------------------------------------------------------------------------------------------------------------------------------------------------------------------------------------------------------------------------------------------------------------------------------------------------------------------------------------------------------------------------------------------------------------------------------------------------------------------------------------|
| 6<br>Molecule 1<br>H 0.0000000 0.9232467 1.2293590<br>H 0.0000000 -0.9232467 1.2293590<br>H -0.0000000 0.9232467 -1.2293590<br>H -0.0000000 -0.9232467 -1.2293590<br>C -0.0000000 0.0000000 0.6675732<br>C 0.0000000 -0.0000000 -0.6675732                                                                                                                                                                                                                                                                                                     | 10<br>Molecule 2<br>H 1.0716094 -2.5511276 -0.0000003<br>H -1.0716095 2.5511281 -0.0000001<br>H 2.0952751 -1.0081485 0.0000003<br>H -2.0952755 1.0081484 0.0000001<br>H -0.9688536 -1.2159346 -0.0000002<br>H 0.9688540 1.2159347 -0.0000001<br>C 0.0006529 0.7263744 -0.0000001<br>C -0.0006547 -0.7263736 0.0000013<br>C 1.1170725 -1.4719244 -0.0000006<br>C -1.1170706 1.4719231 -0.0000004                                                                                                                                                                                                                                                                                                     |
| 14<br>Molecule 3<br>H -0.9525277 1.2011149 0.0000004<br>H 0.9525267 -1.2011153 -0.0000004<br>H 2.1466767 0.9483596 -0.0000005<br>H -2.1466844 -0.9483538 0.0000000<br>H 2.1222281 3.3884926 0.0000003<br>H -2.1222352 -3.3884984 -0.0000006<br>H 0.2712134 3.3813557 0.0000005<br>H -0.2712065 -3.3813613 0.0000003<br>C -0.0010365 0.6767206 -0.0000004<br>C 0.0010410 -0.6767142 0.0000006<br>C 1.2008285 1.4800638 0.0000011<br>C -1.2008236 -1.4801147 -0.0000014<br>C 1.2002189 2.8258219 -0.0000013<br>C -1.2002195 -2.8257713 0.0000013 | 18<br>Molecule 4<br>H 0.9663455 1.2176794 0.0000016<br>H -0.9663493 -1.2176814 0.0000018<br>H -2.0920308 0.9800199 -0.0000005<br>H 2.0920347 -0.9800197 -0.0000015<br>H -0.1468336 3.4046013 -0.0000002<br>H 0.1468219 -3.4046052 -0.0000009<br>H -2.1821816 4.7530984 0.0000016<br>H 2.1821827 -4.7531093 0.0000030<br>H -3.2133565 3.2150322 -0.0000006<br>H 3.2133672 -3.2150287 -0.0000012<br>C 0.0009424 0.7185001 0.0000046<br>C -0.0009259 -0.7185050 0.0000030<br>C 1.1249822 -1.4757392 -0.0000036<br>C -1.1250038 1.4757540 -0.0000015<br>C 1.1175711 -2.9192987 -0.0000039<br>C -1.1175144 2.9192693 -0.0000005<br>C 2.2328780 -3.6739928 0.0000012<br>C -2.2329297 3.6740255 -0.0000023 |
| 7<br>Molecule 5<br>H 0.9127303 -0.0000001 1.4510015<br>H -0.9127304 0.0000000 1.4510016<br>H -0.0000003 -1.5803835 -1.0358614<br>H 0.0000002 1.5803835 -1.0358616<br>C 0.0000001 -0.0000000 0.8638999<br>C 0.0000008 -0.6512093 -0.4980231<br>C -0.0000006 0.6512094 -0.4980231                                                                                                                                                                                                                                                                | 11<br>Molecule 6<br>H -0.8772743 0.0000001 1.8689369<br>H 0.8772739 -0.0000003 1.8689366<br>H 0.0000001 2.2059727 0.6101774<br>H 0.0000003 -2.2059725 0.6101774<br>H 0.0000001 1.3477836 -1.8794144<br>H -0.0000001 -1.3477836 -1.8794142<br>C -0.0000003 0.0000001 1.2141704<br>C -0.0000005 -1.1763050 0.2869545<br>C 0.0000010 1.1763049 0.2869540<br>C 0.0000011 -0.7309867 -0.9928428<br>C -0.0000013 0.7309867 -0.9928422                                                                                                                                                                                                                                                                     |
| 15<br>Molecule 7<br>H 0.9024903 0.0000001 1.9591074<br>H -0.9024910 -0.0000001 1.9591075<br>H -0.0000002 2.1509860 0.6161901<br>H -0.0000001 -2.1509860 0.6161901<br>H 1.9193699 1.3357038 -1.0212815<br>H -1.9193688 -1.3357025 -1.0212802<br>H -1.9193689 1.3357027 -1.0212803<br>H 1.9193700 -1.3357040 -1.0212816<br>C 0.0000004 0.0000000 1.3474477<br>C 0.0000004 1.1201914 0.2735412<br>C 0.0000006 -1.1201914 0.2735412                                                                                                                | 12<br>Molecule 8<br>H -0.0000000 2.4750393 -0.0000003<br>H 0.0000000 -2.4750393 0.0000004<br>H 2.1434469 1.2375192 0.0000002<br>H -2.1434469 -1.2375192 -0.0000003<br>H -2.1434469 1.2375193 0.0000002<br>H 2.1434469 -1.2375193 -0.0000002<br>C 0.0000000 1.3936079 0.0000009<br>C -0.0000000 -1.3936079 -0.0000011<br>C 1.2068995 0.6968038 -0.0000009<br>C -1.2068995 -0.6968038 0.0000010<br>C -1.2068995 0.6968039 -0.0000009                                                                                                                                                                                                                                                                  |

|                   |            |            |            |                                    |            |            |            |
|-------------------|------------|------------|------------|------------------------------------|------------|------------|------------|
| C                 | 1.2343141  | 0.6721548  | -0.5155031 | C                                  | 1.2068995  | -0.6968039 | 0.0000009  |
| C                 | -1.2343154 | -0.6721611 | -0.5155044 | *optimized at RI-MP2/cc-pVTZ level |            |            |            |
| C                 | -1.2343151 | 0.6721610  | -0.5155042 |                                    |            |            |            |
| C                 | 1.2343139  | -0.6721547 | -0.5155029 |                                    |            |            |            |
| 18<br>Molecule 9  |            |            |            | 9<br>Molecule 10                   |            |            |            |
| H                 | 1.2387361  | 2.4852891  | -0.0000002 | H                                  | -0.0000016 | 2.0473103  | 0.8448067  |
| H                 | -1.2387361 | -2.4852892 | 0.0000003  | H                                  | 0.0000022  | -2.0473087 | 0.8448472  |
| H                 | -1.2387361 | 2.4852891  | -0.0000003 | H                                  | -0.0000109 | 1.3707890  | -1.8152153 |
| H                 | 1.2387362  | -2.4852893 | 0.0000003  | H                                  | 0.0000108  | -1.3708283 | -1.8152150 |
| H                 | 3.3702322  | 1.2425151  | 0.0000001  | C                                  | 0.0000081  | 1.0946836  | 0.3475987  |
| H                 | -3.3702322 | -1.2425151 | 0.0000002  | C                                  | -0.0000085 | -1.0946645 | 0.3475732  |
| H                 | -3.3702322 | 1.2425151  | -0.0000001 | C                                  | 0.0000040  | 0.7144683  | -0.9628240 |
| H                 | 3.3702322  | -1.2425150 | -0.0000003 | C                                  | -0.0000037 | -0.7144847 | -0.9627598 |
| C                 | 0.0000000  | 0.7154392  | -0.0000013 | O                                  | -0.0000004 | 0.0000072  | 1.1668186  |
| C                 | -0.0000000 | -0.7154393 | 0.0000016  |                                    |            |            |            |
| C                 | 1.2395355  | 1.4017778  | 0.0000008  |                                    |            |            |            |
| C                 | -1.2395355 | -1.4017777 | -0.0000004 |                                    |            |            |            |
| C                 | -1.2395354 | 1.4017778  | 0.0000011  |                                    |            |            |            |
| C                 | 1.2395354  | -1.4017777 | -0.0000014 |                                    |            |            |            |
| C                 | 2.4302135  | 0.7063576  | -0.0000007 |                                    |            |            |            |
| C                 | -2.4302135 | -0.7063576 | -0.0000009 |                                    |            |            |            |
| C                 | -2.4302136 | 0.7063576  | 0.0000001  |                                    |            |            |            |
| C                 | 2.4302135  | -0.7063576 | 0.0000010  |                                    |            |            |            |
| 10<br>Molecule 11 |            |            |            | 9<br>Molecule 12                   |            |            |            |
| H                 | -0.0000005 | 2.1083509  | 0.7688032  | H                                  | -0.0000004 | 2.1139070  | 0.7122962  |
| H                 | -0.0000004 | -2.1083512 | 0.7688032  | H                                  | 0.0000002  | 1.2013347  | -1.8988291 |
| H                 | 0.0000004  | 1.3576204  | -1.8447764 | H                                  | 0.0000004  | -2.0977404 | 0.6631097  |
| H                 | 0.0000004  | -1.3576204 | -1.8447765 | H                                  | -0.0000007 | -0.0101215 | 2.1118901  |
| H                 | 0.0000017  | 0.0000001  | 2.1246750  | C                                  | 0.0000008  | 1.1192313  | 0.3047695  |
| C                 | 0.0000020  | 1.1246561  | 0.3336327  | C                                  | -0.0000011 | 0.6359040  | -0.9834410 |
| C                 | 0.0000019  | -1.1246564 | 0.3336323  | C                                  | -0.0000018 | -1.0904628 | 0.2837659  |
| C                 | -0.0000006 | 0.7100398  | -0.9849131 | N                                  | 0.0000008  | -0.7421553 | -0.9927654 |
| C                 | -0.0000009 | -0.7100398 | -0.9849128 | N                                  | 0.0000018  | -0.0005283 | 1.1056377  |
| N                 | -0.0000038 | 0.0000004  | 1.1198566  |                                    |            |            |            |
| 11<br>Molecule 13 |            |            |            | 10<br>Molecule 14                  |            |            |            |
| H                 | -0.0000001 | 2.0559118  | 1.3028845  | H                                  | -0.0000006 | 2.0636968  | 1.2508116  |
| H                 | -0.0000000 | -2.0559118 | 1.3028846  | H                                  | 0.0000003  | -2.0636965 | 1.2508115  |
| H                 | -0.0000000 | 2.1518767  | -1.1812720 | H                                  | 0.0000006  | 2.0636960  | -1.2508112 |
| H                 | 0.0000001  | -2.1518767 | -1.1812720 | H                                  | -0.0000003 | -2.0636968 | -1.2508118 |
| H                 | -0.0000001 | -0.0000000 | -2.4677547 | C                                  | -0.0000017 | 1.1328034  | 0.6970646  |
| C                 | 0.0000007  | 1.1428147  | 0.7195745  | C                                  | 0.0000018  | -1.1328076 | 0.6970604  |
| C                 | -0.0000001 | -1.1428147 | 0.7195745  | C                                  | 0.0000017  | 1.1328058  | -0.6970641 |
| C                 | -0.0000006 | 1.1971585  | -0.6736021 | C                                  | -0.0000018 | -1.1328050 | -0.6970608 |
| C                 | -0.0000003 | -1.1971585 | -0.6736021 | N                                  | 0.0000002  | 0.0000035  | 1.4170793  |
| C                 | 0.0000006  | 0.0000000  | -1.3861630 | N                                  | -0.0000002 | 0.0000004  | -1.4170794 |
| N                 | -0.0000001 | 0.0000000  | 1.4258934  |                                    |            |            |            |
| 10<br>Molecule 15 |            |            |            | 10<br>Molecule 16                  |            |            |            |
| H                 | -0.0000003 | 2.1487345  | 1.1194143  | H                                  | 0.0000000  | 2.4009899  | -0.1465016 |
| H                 | 0.0000003  | -2.1487345 | 1.1194143  | H                                  | -0.0000000 | -2.4009899 | -0.1465016 |
| H                 | 0.0000001  | 0.0000000  | -2.3909966 | H                                  | -0.0000000 | 1.2683224  | 2.0975182  |
| H                 | -0.0000000 | 0.0000000  | 2.4340434  | H                                  | 0.0000000  | -1.2683224 | 2.0975182  |
| C                 | -0.0000017 | 1.1849441  | 0.6244814  | C                                  | -0.0000001 | 1.3220461  | -0.0625706 |
| C                 | -0.0000002 | -1.1849442 | 0.6244814  | C                                  | 0.0000001  | -1.3220461 | -0.0625706 |
| C                 | 0.0000015  | 0.0000000  | -1.3081913 | C                                  | -0.0000012 | 0.6922491  | 1.1826742  |
| C                 | 0.0000018  | 0.0000000  | 1.3536021  | C                                  | 0.0000012  | -0.6922491 | 1.1826742  |
| N                 | 0.0000005  | 1.2047540  | -0.7183218 | N                                  | 0.0000013  | 0.6725719  | -1.2368636 |
| N                 | -0.0000020 | -1.2047541 | -0.7183218 | N                                  | -0.0000013 | -0.6725719 | -1.2368636 |

|                                                                                                                                                                                                                                                                                                                                                                                                                                                                                                               |                                                                                                                                                                                                                                                                                                                                                                                                                                                                             |
|---------------------------------------------------------------------------------------------------------------------------------------------------------------------------------------------------------------------------------------------------------------------------------------------------------------------------------------------------------------------------------------------------------------------------------------------------------------------------------------------------------------|-----------------------------------------------------------------------------------------------------------------------------------------------------------------------------------------------------------------------------------------------------------------------------------------------------------------------------------------------------------------------------------------------------------------------------------------------------------------------------|
| 9<br>Molecule 17<br>H 0.0000000 0.0000000 2.3777587<br>H 0.0000000 -2.0592001 -1.1888797<br>H 0.0000000 2.0592002 -1.1888797<br>C -0.0000002 0.0000000 1.2949728<br>C -0.0000002 1.1214797 -0.6474859<br>C -0.0000002 -1.1214797 -0.6474860<br>N 0.0000002 -0.0000001 -1.3812197<br>N 0.0000002 1.1961723 0.6906109<br>N 0.0000002 -1.1961723 0.6906108                                                                                                                                                       | 8<br>Molecule 18<br>H -0.0000001 0.0000000 -2.3443429<br>H -0.0000000 0.0000000 2.3443429<br>C -0.0000012 -0.0000002 1.2633169<br>C -0.0000011 -0.0000002 -1.2633169<br>N 0.0000016 1.2038705 0.6690823<br>N -0.0000003 -1.2038703 0.6690824<br>N -0.0000004 1.2038704 -0.6690823<br>N 0.0000015 -1.2038703 -0.6690824                                                                                                                                                      |
| 4<br>Molecule 19<br>H -0.0000000 0.9345111 -0.5851088<br>H -0.0000000 -0.9345111 -0.5851089<br>C 0.0000000 -0.0000000 -0.0011336<br>O -0.0000000 0.0000001 1.2162993                                                                                                                                                                                                                                                                                                                                          | 10<br>Molecule 20<br>H 0.2672357 2.1177411 -0.0811858<br>H -0.2706580 -2.1191451 0.0050999<br>H -0.7931082 1.3992524 -1.3165325<br>H 0.8095583 -1.4556420 -1.2434852<br>H -0.9237166 -1.2343667 -1.3998431<br>H 0.9426138 1.1750095 -1.4369899<br>C -0.0010054 0.0018813 0.0955916<br>C 0.1165675 1.2610620 -0.7306552<br>C -0.1086545 -1.2912054 -0.6780215<br>O -0.0085518 0.0277723 1.3207213                                                                            |
| 12<br>Molecule 21<br>H 0.0000494 2.1750309 1.2559309<br>H -0.0000624 -2.1750410 1.2559394<br>H -0.0000456 2.1749964 -1.2559163<br>H 0.0000663 -2.1750070 -1.2559245<br>C 0.0000074 -0.0000012 1.4399660<br>C -0.0000098 -0.0000015 -1.4400032<br>C 0.0000311 1.2623586 0.6743512<br>C -0.0000265 -1.2623498 0.6743014<br>C -0.0000163 1.2623125 -0.6743359<br>C 0.0000208 -1.2623029 -0.6742857<br>O 0.0000182 0.0000024 2.6774407<br>O -0.0000328 0.0000025 -2.6774640<br>*optimized at RI-MP2/cc-pVTZ level | 6<br>Molecule 22<br>H -0.9181389 -0.6047967 0.0000001<br>H 1.0604197 -1.7752852 -0.0000009<br>H 2.0213846 -0.3257870 -0.0000003<br>C 0.0026261 -0.0007044 0.0000001<br>O -0.0004313 1.2227863 -0.0000004<br>N 1.1211160 -0.7739624 0.0000015                                                                                                                                                                                                                                |
| 9<br>Molecule 23<br>C -1.4535385 -0.1460459 -0.0137572<br>C 0.0435384 0.0674388 -0.0036137<br>N 0.7882631 -1.0802540 -0.0300894<br>O 0.5565716 1.1831450 -0.0251860<br>H 0.3737140 -1.9782431 0.1354097<br>H 1.7877234 -0.9870211 0.0305193<br>H -1.9256843 0.6889138 0.4937899<br>H -1.7498349 -1.0804199 0.4595219<br>H -1.7987483 -0.1584021 -1.0468075                                                                                                                                                    | 12<br>Molecule 24<br>C -2.5156437 0.0291523 0.0032803<br>C -1.2688900 -0.8368858 -0.0195522<br>C 0.0003103 -0.0033223 -0.0583083<br>N 1.1564389 -0.7346161 -0.1367601<br>O 0.0050363 1.2233025 0.0142435<br>H 1.1301933 -1.7058354 -0.3903800<br>H 2.0111614 -0.2257292 -0.2875381<br>H -1.2218126 -1.4778825 0.8636852<br>H -1.2715911 -1.5046319 -0.8844989<br>H -3.4116558 -0.5879151 0.0446155<br>H -2.5641817 0.6559302 -0.8843390<br>H -2.5040564 0.6898574 0.8666003 |
| 13<br>Molecule 25<br>H -2.1065431 -1.4317395 0.0000015<br>H -0.1704627 -2.7983215 0.0000006<br>H 2.0671476 -1.6557616 0.0000002<br>H 3.1646905 0.5575736 -0.0000023<br>H 2.2294828 2.0273267 -0.0000011                                                                                                                                                                                                                                                                                                       | 15<br>Molecule 26<br>H 0.2122931 -2.6709033 0.0000020<br>H 2.0472045 0.9214924 0.0000007<br>H -1.9374296 -1.7007677 0.0000012<br>H -3.3538478 0.3072525 -0.0000000<br>H -2.6130697 1.6606002 0.8746831                                                                                                                                                                                                                                                                      |

|             |            |            |            |                                    |            |            |            |
|-------------|------------|------------|------------|------------------------------------|------------|------------|------------|
| C           | -0.0614403 | -1.7230070 | 0.0000026  | H                                  | -2.6130698 | 1.6605993  | -0.8746830 |
| C           | 1.1458836  | -1.0955859 | -0.0000016 | C                                  | 1.3549915  | -0.9933332 | -0.0000021 |
| C           | 1.1088609  | 0.3366400  | -0.0000024 | C                                  | -0.0035506 | 1.1206863  | -0.0000020 |
| C           | -1.2231779 | 0.4320932  | 0.0000003  | C                                  | -1.2135013 | 0.3088024  | -0.0000005 |
| O           | -2.3114325 | 0.9979696  | -0.0000012 | C                                  | -1.0817869 | -1.0395569 | 0.0000025  |
| N           | -0.0008648 | 1.0579731  | 0.0000036  | C                                  | -2.5279876 | 1.0167456  | 0.0000005  |
| N           | -1.1988996 | -0.9901176 | -0.0000044 | O                                  | 2.4400423  | -1.5594333 | 0.0000027  |
| N           | 2.2778551  | 1.0234108  | 0.0000042  | O                                  | 0.0215293  | 2.3508550  | 0.0000011  |
|             |            |            |            | N                                  | 0.1432358  | -1.6653702 | -0.0000068 |
|             |            |            |            | N                                  | 1.1906971  | 0.3811858  | 0.0000007  |
|             |            |            |            | *optimized at RI-MP2/cc-pVTZ level |            |            |            |
| 12          |            |            |            | 15                                 |            |            |            |
| Molecule 27 |            |            |            | Molecule 28                        |            |            |            |
| H           | -2.0190306 | -1.5179910 | -0.0000013 | H                                  | 0.9724910  | -3.0652695 | 0.0000008  |
| H           | -0.0217045 | 1.9899598  | -0.0000013 | H                                  | 2.1282579  | 2.0673034  | 0.0000015  |
| H           | 2.1741287  | -1.6030759 | 0.0000000  | H                                  | 3.3043287  | 0.7723159  | 0.0000012  |
| H           | -0.0257062 | -2.7824323 | -0.0000006 | H                                  | -3.0452884 | -0.3331035 | -0.0000011 |
| C           | -1.2377676 | 0.3594731  | -0.0000017 | H                                  | -2.7089700 | 2.1952694  | 0.0000005  |
| C           | 1.2809741  | 0.3891476  | 0.0000018  | C                                  | 0.6633946  | -2.0276064 | 0.0000010  |
| C           | 1.2433659  | -1.0615108 | 0.0000021  | C                                  | 1.3584129  | 0.1743808  | -0.0000031 |
| C           | 0.0530383  | -1.7049613 | -0.0000019 | C                                  | 0.0029969  | 0.5485451  | 0.0000008  |
| O           | -2.3080074 | 0.9510125  | 0.0000010  | C                                  | -0.9220597 | -0.4996009 | -0.0000030 |
| O           | 2.2875846  | 1.0917236  | -0.0000021 | C                                  | -1.9040277 | 1.4786901  | -0.0000019 |
| N           | -1.1387795 | -1.0271625 | 0.0000021  | N                                  | -0.6610026 | -1.8148417 | 0.0000022  |
| N           | -0.0006569 | 0.9775873  | 0.0000018  | N                                  | 1.6729121  | -1.1327488 | -0.0000016 |
|             |            |            |            | N                                  | -2.1481429 | 0.1262956  | 0.0000020  |
|             |            |            |            | N                                  | -0.6168560 | 1.7850284  | 0.0000020  |
|             |            |            |            | N                                  | 2.3516071  | 1.0887607  | -0.0000013 |
|             |            |            |            | *optimized at RI-MP2/cc-pVTZ level |            |            |            |
